# Supplementary material for: Diagnosis of future changes in hydrology for a Canadian Rocky Mountain headwater basin
Source: Copernicus journal article supplement (doi:10.5194/hess-2019-640), 2020-01-03
Supplement: Supplementary file [file hess-2019-640-RC2-supplement.pdf]

#### Page 1

- 6: skip comma
- 9: „Rocky Mountains“
- 16: „during **a** current period (...) and **a** future period (...)“
- 17: what does „PGW“ stand for (comes on page 3)?
- 22: „as well as a shorter snow season“: repetition; „in **the** alpine“

#### Page 3

- 3: „Empirical snow modelling methods ... have great difficulty“: reformulate, because it is not the method having a difficulty but we ourselves in interpreting its results with respect to a certain research question

#### Page 4

- 32: correct „gird“ to „grid“

#### Page 5

- 9: „**the** systematic bias“
- 19: „to force **the** hydrological simulations“

#### Page 6

- 15: „for **the** current period“
- 16: „for **the** future period“
- 17 and 18: „in **the** CTRL period“
- 20: „calculated by **the** equations“

#### Page 7

- 1: better „linearly distributed“ than „linear distribution“
- 16/17: „the simulation had large differences with the observations“: find better formulation
- 29: „suggesting that **the** model had some“

#### Page 8

- 22: „112 **mm**“
- 30: „**the** entire basin“

- in general: always add „**ecozone**“ to its name (everywhere)

#### Page 10

- 10: „for **the** basin“
- 27: explain „**dam3**“
- 32: delete „Whilst“, or connect sentence with previous one („... in May, whilst monthly ...“)

#### Page 11:

- 1: „and had **a** very similar low value“
- 7: „onset of **the** spring freshet“
- 9: delete „While“, or connect sentence with previous one („... (Fig. 11a), while the largest ...“)
- 11: „ranging **from** 0.3 mm“
- 13: „from **the** forest clearing“

- 19: „and **the** entire basin“

Page 12

- 11: „these ... simulations **require**“ (not „requires“, it is plural)
- 9-13: evtl. add Warscher et al. 2019, same (and very recent) discussion
- 18: „in **the** Rocky Mountains region“ ... and probably better skip „in this region“
- 19: „**One** study suggests ...“
- 20: „while **others** reported“
- 23: „gradients“
- 27: „in **the** PGW period“
- 30: you may even add „for other sites with different climates“
- 31: „of **the** snowcover“

Page 13

- 5: „in **the** PGW period“
- 12: „for **the** upper forest ecozone“
- 31/32: evtl. add Strasser et al. 2019

Page 14

- 2: „for **a** more comprehensive“
- 15: „large elevational gradients“ or „**a** large elevational gradient“

Fig 1

- „Hydrometeorological Stations“ should be „Hydrometeorological Station“ (Singular)
- „WRF Grid“ should be „WRF Grid centroid“, and the latter should be explained in the caption. The „and“ before it should be removed

Fig. 2

- caption: „... that **the** best linear fit is **a** straight line ...“

Fig. 3

- caption: Comparison without **-s** (better singular). Add what belongs to where in the caption.

Fig. 5

- caption: „Note that **the** total water year precipitation is presented **here**, and **the** average water year value is presented for **the** other variables.“

Fig. 6

- caption: „... (FCCSF) **and** lower forest ...“

Fig. 7

- caption: better „mean annual“; „**The** line ...“

Fig. 9

- caption: „**The** line ...“

Fig. 10

- caption: „for **the** eight- water year **period** between ...“

Fig. 11

- caption: „**The** line ...“

Fig. 12

- caption: „**The** line ...“

Fig. 13

- caption: „**Mean rainfall ration and runoff** ... ecozones and **the entire** Marmot Creek basin“

Table 4

- caption: better „mean daily“

Warscher, M., Wagner, S., Marke, T., Laux, P., Strasser, U. and Kunstmann, H. (2019): A 5 km Resolution Regional Climate Simulation for Central Europe: Performance in High Mountain Areas and Seasonal, Regional and Elevation-dependent Variations, *Atmosphere*, 10, 682, <https://doi.org/10.3390/atmos10110682>.

Strasser, U., Förster, K., Formayer, H., Marke, T., Meißl, G., Nadeem, I., Stotten, R. and Schermer, M. (2019): Storylines of combined future landuse and climate scenarios and their hydrological impacts in an alpine catchment (Brixental/Austria), *Sci. Tot. Env.*, <https://doi.org/10.1016/j.scitotenv.2018.12.077>.
